# Supplementary material
Source: ML conference proceedings conference paper supplement (https://proceedings.neurips.cc/paper_files/paper/2019/hash/2bc8ae25856bc2a6a1333d1331a3b7a6-Abstract.html)
Supplement: Supplementary file [file 2bc8ae25856bc2a6a1333d1331a3b7a6-Supplemental.zip]

---

# On Learning Non-Convergent Non-Persistent Short-Run MCMC Toward Energy-Based Model

---

Anonymous Author(s)

Affiliation

Address

email

## 1 Supplementary Experimental Results

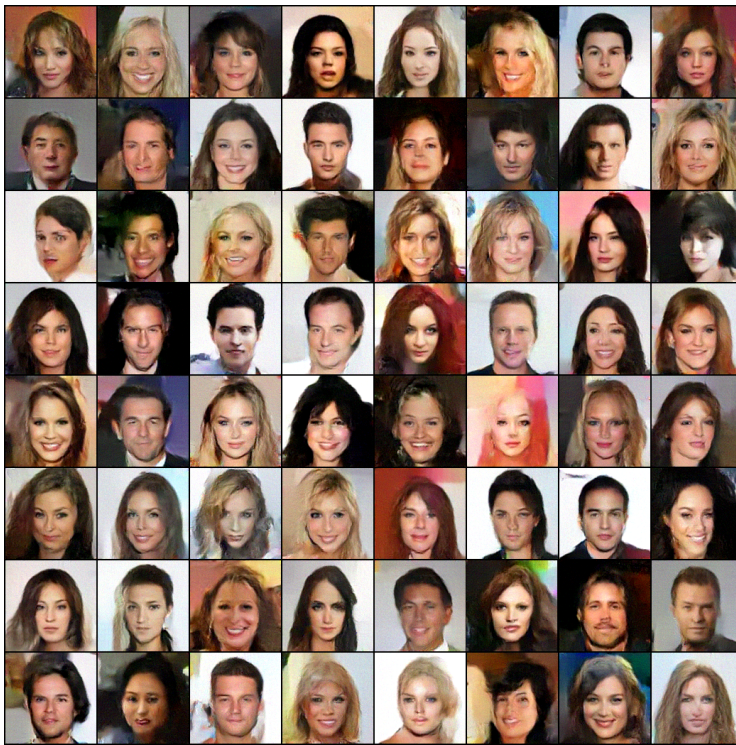

Figure 1: **Synthesis by short-run MCMC**: Generating synthesized examples by running 100 steps of Langevin dynamics initialized from uniform noise for CelebA ( $128 \times 128$ ).

### 2 1.1 Super-Resolution

3 We demonstrate informative initialization by means of super-resolution synthesis. Consider the  
4 problem of super-resolution in which we aim to generate a high-resolution image given a low-  
5 resolution image. In training, we run a small number of Langevin steps from the low-resolution  
6 image. That is, the model is still  $M_\theta p_0$ , except  $p_0$  is lower resolution, not uniform. Figure 2  
7 demonstrates up-sampling from  $4 \times 4$ ,  $8 \times 8$ , and  $16 \times 16$  to  $64 \times 64$  pixels. While the choice of  
8 an informative initialization  $p_0$  is less desirable, the super-resolution experiment demonstrates that  
9 short-run MCMC can be generalized to various tasks.

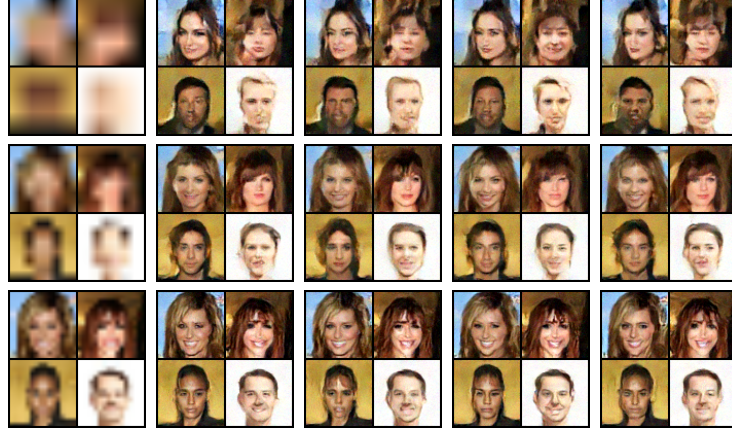

Figure 2: Super-resolution using Langevin with  $K = 100$  and  $n_f = 32$  on CelebA ( $64 \times 64$ ). The random seed is varied to generate four sets of samples for each initialization. Top row:  $4 \times 4$  to  $64 \times 64$ . Middle row:  $8 \times 8$  to  $64 \times 64$ . Bottom row:  $16 \times 16$  to  $64 \times 64$ .

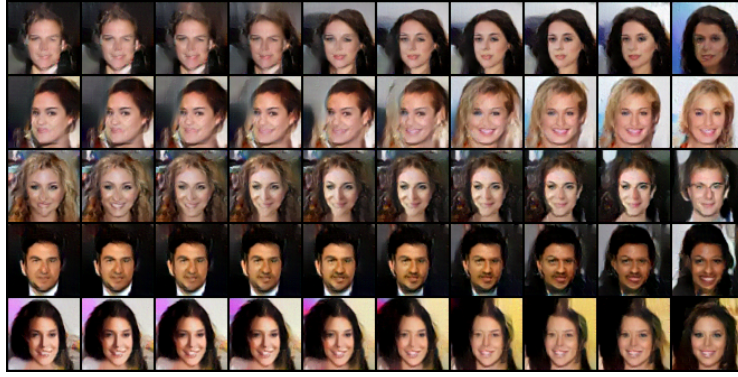

Figure 3: Interpolation between generated examples with  $K = 100$  and  $n_f = 32$  on CelebA ( $64 \times 64$ ). The transition depicts the sequence  $M_\theta(z_\rho)$  with interpolated noise  $z_\rho = \rho z_1 + \sqrt{1 - \rho^2} z_2$  where  $\rho \in [0, 1]$ . Left:  $z_1 \sim p_0$ . Right:  $z_2 \sim p_0$ .

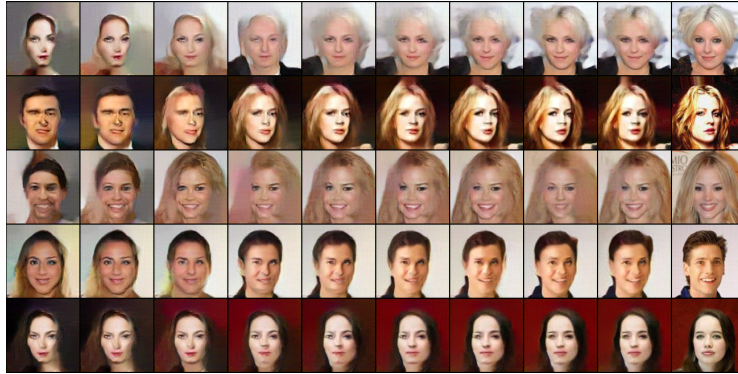

Figure 4: Reconstruction of observed examples with  $K = 100$  and  $n_f = 32$  on CelebA ( $64 \times 64$ ). The transition depicts  $M_\theta(z_t)$  over time  $t$  from random initialization  $t = 0$  to reconstruction  $t = 200$ . Left: Random initialization. Right: Observed examples.

## 10 2 Appendix

### 11 2.1 Proof of Pythagorean Identity

12 For  $p \in \Omega$ , let  $\mathbb{E}_p[h(x)] = \mathbb{E}_{p_{\text{data}}}[h(x)] = \hat{h}$ .

$$\text{KL}(p|p_\theta) = \mathbb{E}_p[\log p(x) - \langle \theta, h(x) \rangle + \log Z(\theta)] \quad (1)$$

$$= -H(p) - \langle \theta, \hat{h} \rangle + \log Z(\theta), \quad (2)$$

13 where  $H(p) = -\mathbb{E}_p[\log p(x)]$  is the entropy of  $p$ .

14 For  $\hat{p} \in \Omega \cap \Theta$ ,

$$\text{KL}(\hat{p}|p_\theta) = -H(\hat{p}) - \langle \theta, \hat{h} \rangle + \log Z(\theta). \quad (3)$$

15

$$\text{KL}(p|\hat{p}) = \mathbb{E}_p[\log p(x)] - \mathbb{E}_p[\log \hat{p}(x)] \quad (4)$$

$$= \mathbb{E}_p[\log p(x)] - \mathbb{E}_{\hat{p}}[\log \hat{p}(x)] \quad (5)$$

$$= -H(p) + H(\hat{p}). \quad (6)$$

16 Thus  $\text{KL}(p|p_\theta) = \text{KL}(p|\hat{p}) + \text{KL}(\hat{p}|p_\theta)$ .

### 17 2.2 Estimating Equation and Cramer-Rao Theory

18 For a model  $q_\theta$ , we can estimate  $\theta$  by solving the estimating equation  $\mathbb{E}_{q_\theta}[h(x, \theta)] = \frac{1}{n} \sum_{i=1}^n h(x_i, \theta)$ .

19 Assume the solution exists and let it be  $\hat{\theta}$ . Assume there exists  $\theta_{\text{true}}$  so that  $p_{\text{data}} = q_{\theta_{\text{true}}}$ . Let  $c(\theta) =$

20  $\mathbb{E}_{q_\theta}[h(x, \theta)]$ . We can change  $h(x, \theta) \leftarrow h(x, \theta) - c(\theta)$ . Then  $\mathbb{E}_{q_\theta}[h(x, \theta)] = 0 \forall \theta$ , and the estimating

21 equation becomes  $\frac{1}{n} \sum_{i=1}^n h(x_i, \theta) = 0$ . A Taylor expansion around  $\theta_{\text{true}}$  gives us the asymptotic

22 linear equation  $\frac{1}{n} \sum_{i=1}^n [h(x_i, \theta_{\text{true}}) + h'(x_i, \theta_{\text{true}})(\theta - \theta_{\text{true}})] = 0$ , where  $h'(x, \theta) = \frac{\partial}{\partial \theta} h(x, \theta)$ . Thus

23 the estimate  $\hat{\theta} = \theta_{\text{true}} - [\frac{1}{n} \sum_{i=1}^n h'(x_i, \theta_{\text{true}})]^{-1} [\frac{1}{n} \sum_{i=1}^n h(x_i, \theta_{\text{true}})]$ , i.e., one-step Newton-Raphson

24 update from  $\theta_{\text{true}}$ . Since  $\mathbb{E}_{q_\theta}[h(x, \theta)] = 0$  for any  $\theta$ , including  $\theta_{\text{true}}$ , the estimator  $\hat{\theta}$  is asymptotically

25 unbiased. The Cramer-Rao theory establishes that  $\hat{\theta}$  has an asymptotic normal distribution,  $\sqrt{n}(\hat{\theta} -$

26  $\theta_{\text{true}}) \sim \text{N}(0, V)$ , where  $V = \mathbb{E}_{\theta_{\text{true}}}[h'(x, \theta_{\text{true}})]^{-1} \text{Var}_{\theta_{\text{true}}}[h(x; \theta_{\text{true}})] \mathbb{E}_{\theta_{\text{true}}}[h'(x, \theta_{\text{true}})]^{-1}$ .  $V$  is minimized

27 if we take  $h(x, \theta) = \frac{\partial}{\partial \theta} \log q_\theta(x)$ , which leads to the maximum likelihood estimating equation, and

28 the corresponding  $V = I(\theta_{\text{true}})^{-1}$ , where  $I$  is the Fisher information.

## 29 2.3 Code

```

import torch as t, torch.nn as nn
import torchvision as tv, torchvision.transforms as tr

seed = 1
im_sz = 32
sigma = 3e-2 # decrease until training is unstable
n_ch = 3
m = 8*2
K = 100
n_f = 64 # increase until compute is exhausted
n_i = 10*5

t.manual_seed(seed)
if t.cuda.is_available():
    t.cuda.manual_seed_all(seed)

device = t.device('cuda' if t.cuda.is_available() else 'cpu')

class F(nn.Module):
    def __init__(self, n_c=n_ch, n_f=n_f, l=0.2):
        super(F, self).__init__()
        self.f = nn.Sequential(
            nn.Conv2d(n_c, n_f, 3, 1, 1),
            nn.LeakyReLU(1),
            nn.Conv2d(n_f, n_f * 2, 4, 2, 1),
            nn.LeakyReLU(1),
            nn.Conv2d(n_f * 2, n_f * 4, 4, 2, 1),
            nn.LeakyReLU(1),
            nn.Conv2d(n_f * 4, n_f * 8, 4, 2, 1),
            nn.LeakyReLU(1),
            nn.Conv2d(n_f * 8, 1, 4, 1, 0))

    def forward(self, x):
        return self.f(x).squeeze()

f = F().to(device)

transform = tr.Compose([tr.Resize(im_sz), tr.ToTensor(), tr.Normalize((.5, .5, .5), (.5, .5, .5))])
p_d = t.stack([x[0] for x in tv.datasets.CIFAR10(root='data/cifar10', transform=transform)]).to(device)
noise = lambda x: x + sigma * t.randn_like(x)
def sample_p_d():
    p_d_i = t.LongTensor(m).random_(0, p_d.shape[0])
    return noise(p_d[p_d_i]).detach()

sample_p_0 = lambda: t.FloatTensor(m, n_ch, im_sz, im_sz).uniform_(-1, 1).to(device)
def sample_q(K=K):
    x_k = t.autograd.Variable(sample_p_0(), requires_grad=True)
    for k in range(K):
        f_prime = t.autograd.grad(f(x_k).sum(), [x_k], retain_graph=True)[0]
        x_k.data += f_prime + 1e-2 * t.randn_like(x_k)
    return x_k.detach()

sqrt = lambda x: int(t.sqrt(t.Tensor([x])))
plot = lambda p, x: tv.utils.save_image(t.clamp(x, -1., 1.), p, normalize=True, nrow=sqrt(m))

optim = t.optim.Adam(f.parameters(), lr=1e-4, betas=[.9, .999])

for i in range(n_i):
    x_p_d, x_q = sample_p_d(), sample_q()
    L = f(x_p_d).mean() - f(x_q).mean()
    optim.zero_grad()
    (-L).backward()
    optim.step()

    if i % 100 == 0:
        print('{:>6d}_f(x_p_d)={:>14.9f}_f(x_q)={:>14.9f}'.format(i, f(x_p_d).mean(), f(x_q).mean()))
        plot('x_q-{:>06d}.png'.format(i), x_q)

```

## 2.4 Model Architecture

We use the following notation. Convolutional operation  $\text{conv}(n)$  with  $n$  output feature maps and bias term. Leaky-ReLU nonlinearity  $\text{LReLU}$  with default leaky factor 0.2. We set  $n_f \in \{32, 64, 128\}$ .

| Energy-based Model ( $32 \times 32 \times 3$ )   |                                 |        |
|--------------------------------------------------|---------------------------------|--------|
| Layers                                           | In-Out Size                     | Stride |
| Input                                            | $32 \times 32 \times 3$         |        |
| $3 \times 3 \text{ conv}(n_f), \text{LReLU}$     | $32 \times 32 \times n_f$       | 1      |
| $4 \times 4 \text{ conv}(2 * n_f), \text{LReLU}$ | $16 \times 16 \times (2 * n_f)$ | 2      |
| $4 \times 4 \text{ conv}(4 * n_f), \text{LReLU}$ | $8 \times 8 \times (4 * n_f)$   | 2      |
| $4 \times 4 \text{ conv}(8 * n_f), \text{LReLU}$ | $4 \times 4 \times (8 * n_f)$   | 2      |
| $4 \times 4 \text{ conv}(1)$                     | $1 \times 1 \times 1$           | 1      |

Table 1: Network structures ( $32 \times 32 \times 3$ ).

| Energy-based Model ( $64 \times 64 \times 3$ )   |                                 |        |
|--------------------------------------------------|---------------------------------|--------|
| Layers                                           | In-Out Size                     | Stride |
| Input                                            | $64 \times 64 \times 3$         |        |
| $3 \times 3 \text{ conv}(n_f), \text{LReLU}$     | $64 \times 64 \times n_f$       | 1      |
| $4 \times 4 \text{ conv}(2 * n_f), \text{LReLU}$ | $32 \times 32 \times (2 * n_f)$ | 2      |
| $4 \times 4 \text{ conv}(4 * n_f), \text{LReLU}$ | $16 \times 16 \times (4 * n_f)$ | 2      |
| $4 \times 4 \text{ conv}(8 * n_f), \text{LReLU}$ | $8 \times 8 \times (8 * n_f)$   | 2      |
| $4 \times 4 \text{ conv}(8 * n_f), \text{LReLU}$ | $4 \times 4 \times (8 * n_f)$   | 2      |
| $4 \times 4 \text{ conv}(1)$                     | $1 \times 1 \times 1$           | 1      |

Table 2: Network structures ( $64 \times 64 \times 3$ ).

| Energy-based Model ( $128 \times 128 \times 3$ ) |                                 |        |
|--------------------------------------------------|---------------------------------|--------|
| Layers                                           | In-Out Size                     | Stride |
| Input                                            | $128 \times 128 \times 3$       |        |
| $3 \times 3 \text{ conv}(n_f), \text{LReLU}$     | $128 \times 128 \times n_f$     | 1      |
| $4 \times 4 \text{ conv}(2 * n_f), \text{LReLU}$ | $64 \times 64 \times (2 * n_f)$ | 2      |
| $4 \times 4 \text{ conv}(4 * n_f), \text{LReLU}$ | $32 \times 32 \times (4 * n_f)$ | 2      |
| $4 \times 4 \text{ conv}(8 * n_f), \text{LReLU}$ | $16 \times 16 \times (8 * n_f)$ | 2      |
| $4 \times 4 \text{ conv}(8 * n_f), \text{LReLU}$ | $8 \times 8 \times (8 * n_f)$   | 2      |
| $4 \times 4 \text{ conv}(8 * n_f), \text{LReLU}$ | $4 \times 4 \times (8 * n_f)$   | 2      |
| $4 \times 4 \text{ conv}(1)$                     | $1 \times 1 \times 1$           | 1      |

Table 3: Network structures ( $128 \times 128 \times 3$ ).
